# Supplementary material for: Microfluidic Device for the Analysis of Angiogenic Sprouting under Bidirectional Biochemical Gradients
Source: MDPI journal article supplement (doi:10.3390/mi11121049), 2020-11-27
Supplement: s1 [file s1]

# Supplementary Materials: Microfluidic device for the analysis of angiogenic sprouting under bidirectional biochemical gradients

Keigo Nishimura, Minghao Nie, Shigenori Miura and Shoji Takeuchi \*

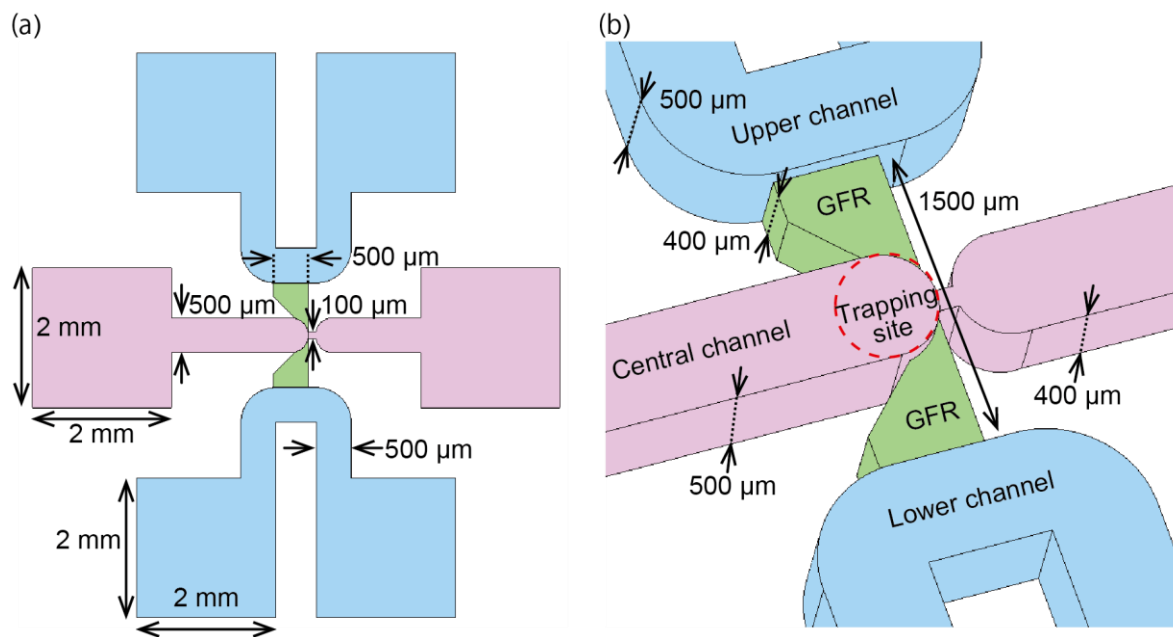

**Figure S1.** Design of the microchannel of the device: (a) top view of the design; (b) perspective view of the design.

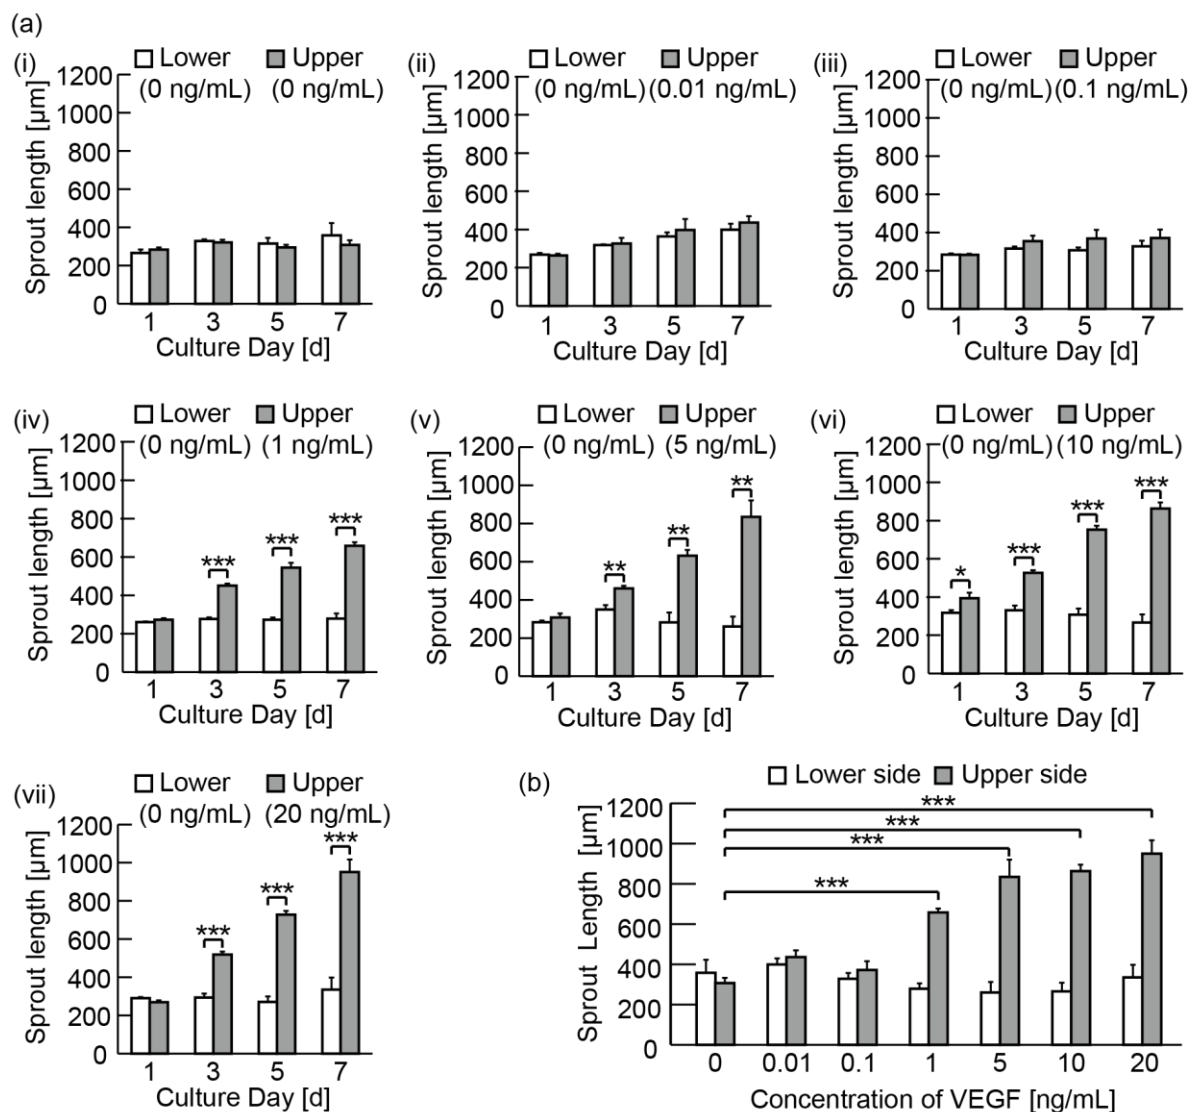

**Figure S2.** Evaluation of bidirectional angiogenic sprouting induced with VEGF-containing media: (a) graphs of angiogenic sprout length during the culture in VEGF gradients on day 1, 3, 5, and 7. The results are shown as the mean  $\pm$  standard error (s.e.) of 3–5 devices ( $n = 4$  (a-i, a-iv, a-vi),  $n = 3$  (a-ii, a-v),  $n = 5$  (a-iii, a-vii)). \*:  $p < 0.05$ , \*\*:  $p < 0.01$ , \*\*\*:  $p < 0.001$  (Student's t-test); (b) Summary graph of angiogenic sprout length induced in media with various concentration of VEGF on day 7. \*\*\*:  $p < 0.001$  (Dunnett's test).

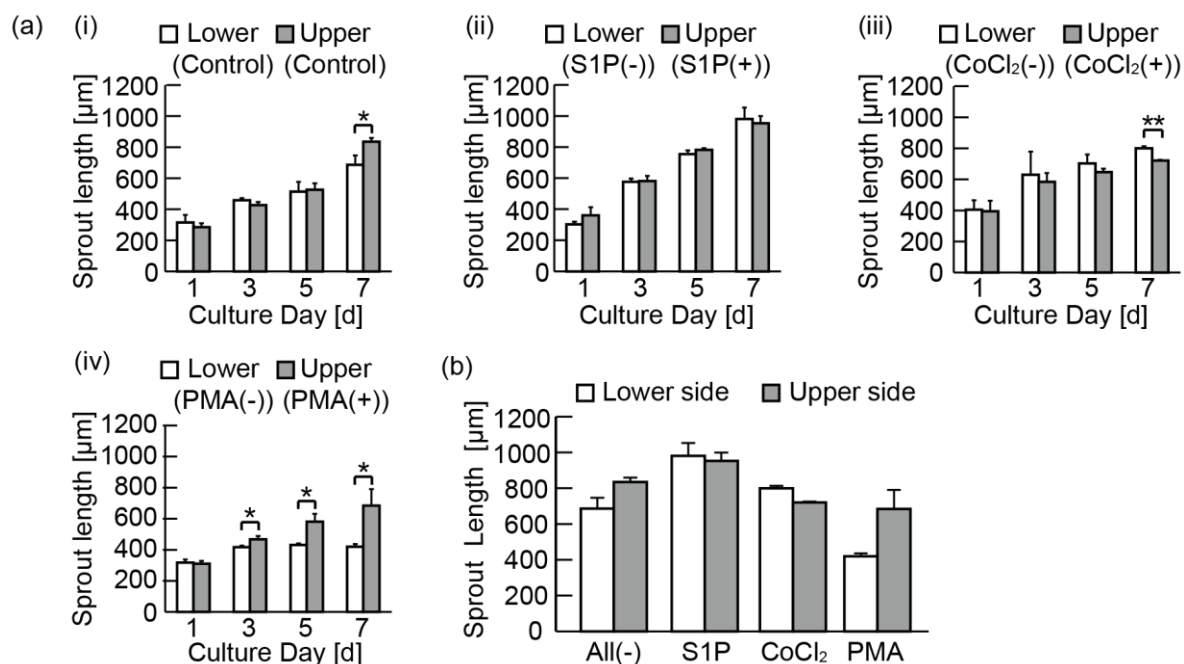

**Figure S3.** Evaluation of bidirectional angiogenic sprouting induced with media containing various chemical stimulators of angiogenic sprouting: (a) graphs of length of angiogenic sprouts during the culture under various chemical gradients on day 1, 3, 5, and 7. The results are shown as the mean  $\pm$  standard error (s.e.) of 3 devices. \*:  $p < 0.05$ , \*\*:  $p < 0.01$  (Student's t-test); (b) summary graph of length of angiogenic sprouts induced in media with various chemicals on day 7.

**Supplementary Video 1.** Analysis of the flow using microbeads without trapped spheroids

(Media volume: 50  $\mu$ L, Speed:  $\times 0.053$ )

**Supplementary Video 2.** Evaluation on the strength of the adhesion of a trapped spheroid to gels

(Flow rate: 3800  $\mu$ L/min, Speed:  $\times 40$ )

**Supplementary Video 3.** Analysis of the flow using microbeads with a trapped spheroid

(Media volume: 200  $\mu$ L, Speed:  $\times 0.067$ )
