# Supplementary material for: Microfluidic Device for the Analysis of Angiogenic Sprouting under Bidirectional Biochemical Gradients
Source: Micromachines (Basel). 2020 Nov 27;11(12):1049. doi: 10.3390/mi11121049 (PMC7761305; doi:10.3390/mi11121049)
Supplement: Supplementary file 1 [file micromachines-11-01049-s001.zip]

Archive with 4 entries (4 files):
- K. Nishimura, et al._Supplementary Materials/K. Nishimura, et al._Supplementary Materials.pdf
- K. Nishimura, et al._Supplementary Materials/K. Nishimura, et al._Supplementary Video 1.mp4
- K. Nishimura, et al._Supplementary Materials/K. Nishimura, et al._Supplementary Video 2.mp4
- K. Nishimura, et al._Supplementary Materials/K. Nishimura, et al._Supplementary Video 3.mp4
